# Supplementary material for: Early-twentieth-century cold bias in ocean surface temperature observations
Source: PubMed Central journal article supplement (PMC11578896; doi:10.1038/s41586-024-08230-1), 2024-11-20
Supplement: 41586_2024_8230_MOESM1_ESM.pdf [file 41586_2024_8230_MOESM1_ESM.pdf]

---

**Supplementary information**

---

**Early-twentieth-century cold bias in ocean surface temperature observations**

---

In the format provided by the authors and unedited

# Supplementary Information to ‘Early-twentieth-century cold bias in ocean surface temperature observations’

Sebastian Sippel<sup>1,2</sup>, Elizabeth C. Kent<sup>3</sup>, Nicolai Meinshausen<sup>4</sup>, Duo Chan<sup>5</sup>, Christopher Kadow<sup>6</sup>, Raphael Neukom<sup>7,8</sup>, Erich M. Fischer<sup>2</sup>, Vincent Humphrey<sup>9</sup>, Robert Rohde<sup>10</sup>, Iris de Vries<sup>2</sup>, Reto Knutti<sup>2</sup>

<sup>1</sup>*Institute for Meteorology, Leipzig University, 04103 Leipzig, Germany*

<sup>2</sup>*Institute for Atmospheric and Climate Science, ETH Zürich, 8006 Zürich, Switzerland*

<sup>3</sup>*National Oceanography Centre, Southampton SO14 3ZH, United Kingdom*

<sup>4</sup>*Seminar for Statistics, ETH Zürich, 8006 Zürich, Switzerland*

<sup>5</sup>*School of Ocean and Earth Science, University of Southampton, Southampton, United Kingdom*

<sup>6</sup>*Deutsches Klimarechenzentrum GmbH, 20146 Hamburg, Germany*

<sup>7</sup>*WSL Institute for Snow and Avalanche Research SLF, Davos, Switzerland*

<sup>8</sup>*Climate Change, Extremes and Natural Hazards in Alpine Regions Research Centre, CERC, Davos, Switzerland*

<sup>9</sup>*Federal Office of Meteorology and Climatology MeteoSwiss, 8059 Zürich-Airport, Switzerland*

<sup>10</sup>*Berkeley Earth, Berkeley, CA, USA*

17 **Contents**

|    |                                                                                           |           |
|----|-------------------------------------------------------------------------------------------|-----------|
| 18 | <b>1 Evaluation of reconstruction method</b>                                              | <b>5</b>  |
| 19 | <b>2 Supplementary Reconstructions</b>                                                    | <b>10</b> |
| 20 | <b>3 Analysis of individual paleoclimate proxies from terrestrial and marine sources</b>  | <b>19</b> |
| 21 | <b>4 Supplementary analysis of ICOADS contributing sources</b>                            | <b>20</b> |
| 22 | <b>5 Ocean warming constrained by land warming and paleoclimate reconstructions using</b> |           |
| 23 | <b>50-year trends</b>                                                                     | <b>27</b> |
| 24 | <b>6 Supplementary Tables</b>                                                             | <b>28</b> |

25 **List of Supplementary Figures**

26 1 Evaluation of annual GMST reconstruction as a function of time and training setup 9

27 2 Global mean surface temperature (GMST) reconstruction from the land and ocean  
28 record, but without including biases and uncertainties in the training setup. . . . . 13

29 3 Global mean sea surface temperature (GMSST) reconstruction from the land and  
30 ocean record. . . . . 15

31 4 Global mean land surface air temperature (GMLSAT) reconstruction from the land  
32 and ocean record. . . . . 17

33 5 GMST reconstruction from SSTs with global mean removed . . . . . 18

34 6 Dupelim output information from ICOADS Release 1, 1800-1899 . . . . . 25

35 7 Dupelim output information from ICOADS Release 1, 1900-1945 . . . . . 26

36 8 Ocean warming constrained by land warming and paleoclimate reconstructions  
37 using 50-year trends . . . . . 27

38 **List of Supplementary Tables**

39 1 Overview of global mean temperature reconstructions by source and training dataset. 28

40 2 Overview of gridded observational datasets used for reconstructions . . . . . 29

41 3 Overview of GMST datasets and paleoclimate reconstructions . . . . . 30

42 4 Overview of CMIP6 models used in the analysis. . . . . 31

## 43 1 Evaluation of reconstruction method

44 In this supplementary section, we provide a comprehensive evaluation and further discussion of  
45 our reconstruction method, which was outlined in the main text. Our approach addresses the  
46 measurement uncertainties and biases in historical temperature records by utilizing the uncertainty  
47 and bias estimates developed for the CRUTEM5 and HadSST4 datasets (Kennedy et al. 2019;  
48 Osborn et al. 2021; Morice et al. 2021). Specifically, we incorporate these models to refine our  
49 regression coefficients, denoted as  $\hat{\beta}_{\text{Land:1895-06}}^{*\text{GMST}}$  for coefficients that account for uncertainties (that is,  
50 uncertainty estimates are added to CMIP6 model for training of the statistical model), compared to  
51  $\hat{\beta}_{\text{Land:1895-06}}^{\text{GMST}}$  for coefficients derived without consideration of these uncertainties and biases (that is,  
52 no uncertainties added during training). The subscript indicates the source data (land or ocean) and  
53 the respective time step of the mask (e.g., June 1895). The overall setup is illustrated in Extended  
54 Data Fig. 1.

55 **Illustrative Maps of Regression Coefficients** In Extended Data Fig. 2, we show maps of regres-  
56 sion coefficients for an illustrative time step with sparse coverage in the early record (June 1895).  
57 These maps show coefficients for the land and ocean early coverage both without considering un-  
58 certainties ( $\hat{\beta}_{\text{Land:1895-06}}^{\text{GMST}}$ , panel a;  $\hat{\beta}_{\text{Ocean:1895-06}}^{\text{GMST}}$ , panel c) and coefficients when uncertainty and bias  
59 estimates are considered at training time ( $\hat{\beta}_{\text{Land:1895-06}}^{*\text{GMST}}$ , panel b;  $\hat{\beta}_{\text{Ocean:1895-06}}^{*\text{GMST}}$ , panel d). When training  
60 is based on CMIP6 models only ( $\hat{\beta}_{\text{Land:1895-06}}^{\text{GMST}}$ , that is, without considering uncertainty and bias esti-  
61 mates), the algorithm assigns large positive weights to tropical land grid cells, particularly islands  
62 and coastal stations, which thus exert a predominant influence on GMST estimates (Extended Data

63 Figure 2a). A similar behaviour is observed for coefficients over the ocean ( $\hat{\beta}_{\text{Ocean:1895-06}}^{\text{GMST}}$ , Extended  
64 Data Fig. 2c), where in particular coastal ocean grid cells and ocean grid cells that lie adjacent to  
65 large unobserved regions (e.g., tropical Pacific) show large positive weights. This behaviour may  
66 be understood from the fact that tropical regions are highly informative for global temperature  
67 estimates, and the pattern of regression coefficients is qualitatively consistent with other global  
68 temperature estimators, such as those similar to kriging (Cowtan et al. 2018).

69 However, this approach may not be ideal because observational uncertainties are not con-  
70 sidered, and uncertainties are not equally distributed across space. In particular tropical grid cells  
71 in the early record are likely affected by large relative uncertainties and a relatively poor station  
72 density. When uncertainties are incorporated at training time (see details in methods in the main  
73 text), regression coefficients are distributed more evenly across the spatial domain for both land  
74 and ocean (Extended Data Fig. 2b,d). This behaviour thus reflects the trade-off to make use of the  
75 most informative grid cells in the reconstruction, but at the same time minimizing the effect of un-  
76 certainties. Overall, this methodological adjustment reduces the influence of individual, uncertain  
77 grid cells. The performance of our regression method for reconstructing GMST in CMIP6 models  
78 for the illustrative June 1895 ocean and land coverage is good and shown in Extended Data Fig. 3.

79 **Systematic Evaluation of Reconstruction Error** We systematically assess the error estimates  
80 across time by comparing our reconstruction method to the global temperature average estimator  
81 (Cowtan et al. 2018), a method similar to kriging. The evaluation is based on a reconstruction  
82 of CMIP6 models' GMST from a sparse coverage mask of either land or ocean. We evaluate the

83 reconstruction method where uncertainties are considered and not considered at training time (i.e.,  
84  $\hat{\beta}_{\text{Land}}^{\text{GMST}}$ ,  $\hat{\beta}_{\text{Land}}^{*\text{GMST}}$ , pink vs. red lines in Supplementary Figure 1). Both methods are evaluated against  
85 CMIP6 models not used in training, and either based on the raw output of those CMIP6 models  
86 without adding uncertainty estimates (dashed lines in Supplementary Figure 1), and for a scenario  
87 where uncertainty estimates are added for evaluation (solid lines in Supplementary Figure 1). The  
88 benchmark GTA estimator (Cowtan et al. 2018) is adapted such that the global temperature average  
89 is obtained for land and ocean separately; and in a second step we scale the obtained averages  
90 in CMIP6 data to obtain a GMST estimate from land and ocean data separately. Including our  
91 benchmark GTA estimator (Cowtan et al. 2018), this yields in total six scenarios.

92 The land-based reconstructions indicate a sharp reduction in annual mean squared errors for  
93 all scenarios over time as coverage increases (Supplementary Figure 1a). Notably, after 1930,  
94 the errors decrease strongly for the evaluation with uncertainties added, because of a large reduc-  
95 tion of spread in the CRUTEM5 bias ensembles (Morice et al. 2021). Before 1930, the lowest  
96 mean squared errors are observed when the data is evaluated without injected uncertainty esti-  
97 mates, for all scenarios. However, when uncertainties are included in the evaluation, the regression  
98 model trained with uncertainties ( $\hat{\beta}_{\text{Land:1895-06}}^{*\text{GMST}}$ ) outperforms other models and the GTA estimator  
99 by approximately 15-25% before 1930 (Supplementary Figure 1c), emphasizing the importance of  
100 incorporating uncertainties in both training and evaluation phases.

101 The SST-based reconstruction exhibits similar trends, although the impact of different re-  
102 construction techniques is less pronounced compared to land. Importantly, the model trained with



103 uncertainties consistently achieves higher performance when evaluated against data where uncer-  
104 tainties are considered, and it outperforms the GTA estimator as well (Supplementary Figure 1d).

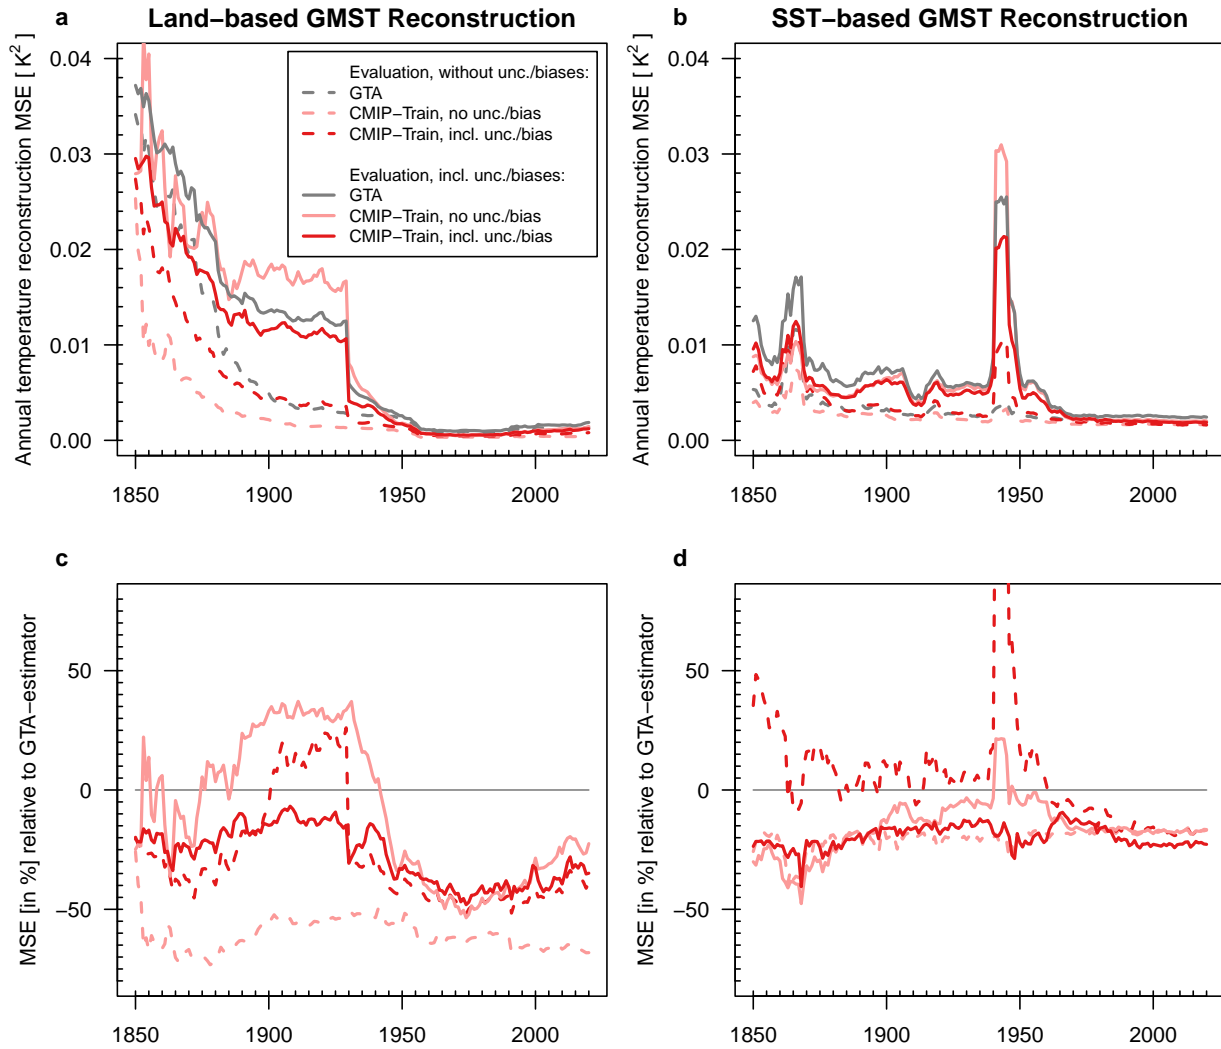

Supplementary Figure 1: **Evaluation of annual GMST reconstruction as a function of time and training setup** a. Reconstruction MSE for land-based GMST reconstruction, and c. relative to the ‘Global Temperature Average’ (GTA) baseline estimator similar to kriging (Cowtan et al. 2018). b. SST-based reconstruction MSE, and d. relative to the GTA baseline estimator (Cowtan et al. 2018).

## 105 **2 Supplementary Reconstructions**

106 To further evaluate our findings and reconstruction method, we provide reconstructions of different  
107 target metrics and methods across various source datasets:

108 **Supplementary Figure 2** shows a reconstruction of GMST (similar to Figure 1 in the main  
109 text), but without adding estimates of biases and uncertainties at training time. The ocean-  
110 based GMST reconstruction is about 0.20°C colder than the land-based reconstruction in the  
111 1900-1930 period; which is a slightly smaller discrepancy than when estimates of uncertain-  
112 ties and biases are added during training time (Fig. 1 in the Main Text).

113 **Supplementary Figure 3** illustrates a reconstruction of global mean sea surface temperature  
114 (GMSST) from land and ocean, respectively.

115 **Supplementary Figure 4** illustrates a reconstruction of global mean land surface air tem-  
116 perature (GMLSAT).

117 **Supplementary Figure 5** compares our GMST reconstruction estimates from land and  
118 ocean to an additional SST-based reconstruction where the global mean SST has been re-  
119 moved from each grid cell, similar to (Sippel et al. 2020). While the mean-removed recon-  
120 struction reduces the overall trend as expected, it is nonetheless instructive to see that the  
121 mean-removed SST reconstruction shows higher correlation with the land-based reconstruc-  
122 tion in the early twentieth century (Supplementary Figure 5b).

123 Overall, the additional reconstructions shown in Supplementary Figures 2-5 all indicate a  
124 pronounced ocean cold anomaly irrespective of the target metric or the reconstruction method.  
125 Thus, all these additional reconstructions yield very similar conclusions regarding the early twen-  
126 tieth century to those derived in the main text.

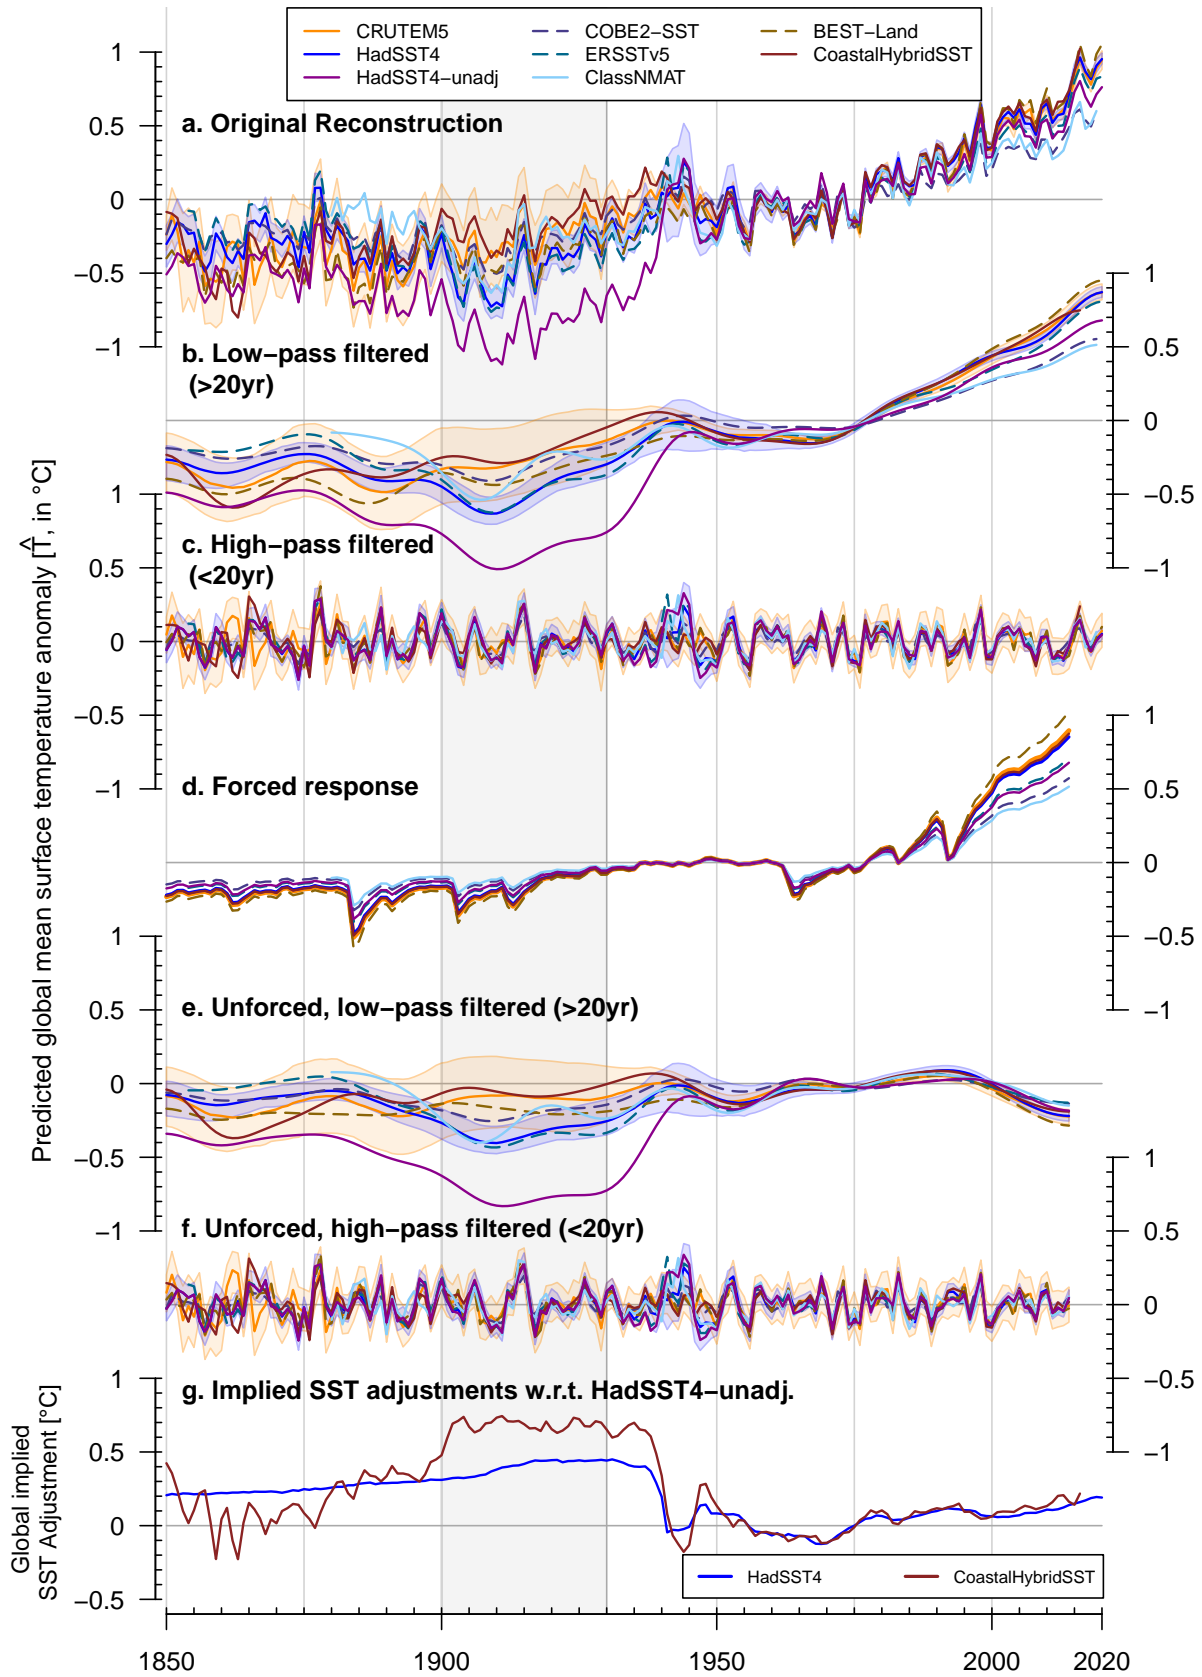

Supplementary Figure 2: **Global mean surface temperature (GMST) reconstruction from the land and ocean record, but without including biases and uncertainties in the training setup.** GMST reconstructions from the SST record (HadSST4) and the land air temperature record (CRUTEM5). GMST reconstructions from HadSST4-unadj, ClassNMAT, CoastalHybridSST, BEST-Land, COBE-SST2 and ERSSTv5 are similarly derived and shown for comparison. **a.** Original GMST reconstructions, **b.** low-pass filtered reconstructions ( $> 20$ -year time scale), **c.** high-pass filtered reconstructions ( $< 20$ -year time scale), **d.** forced GMST response for each reconstruction, **e.** unforced, low-pass filtered reconstruction, **f.** unforced, high-pass filtered reconstruction. **g.** Implied global mean adjustments relative to unadjusted HadSST4 data, shown as the difference between the global reconstructions ( $\hat{T}_{HadSST4}^{GMST} - \hat{T}_{HadSST4-unadj}^{GMST}$ , and  $\hat{T}_{CoastalHybridSST}^{GMST} - \hat{T}_{HadSST4-unadj}^{GMST}$ ). Shading represents the 95th percentile uncertainty ranges of the  $\hat{T}_{HadSST4}^{GMST}$  and  $\hat{T}_{CRUTEM5}^{GMST}$  reconstructions, obtained by propagating the HadSST4 and CRUTEM5 ensemble of uncertainty realizations; bold lines show the median across the ensemble.

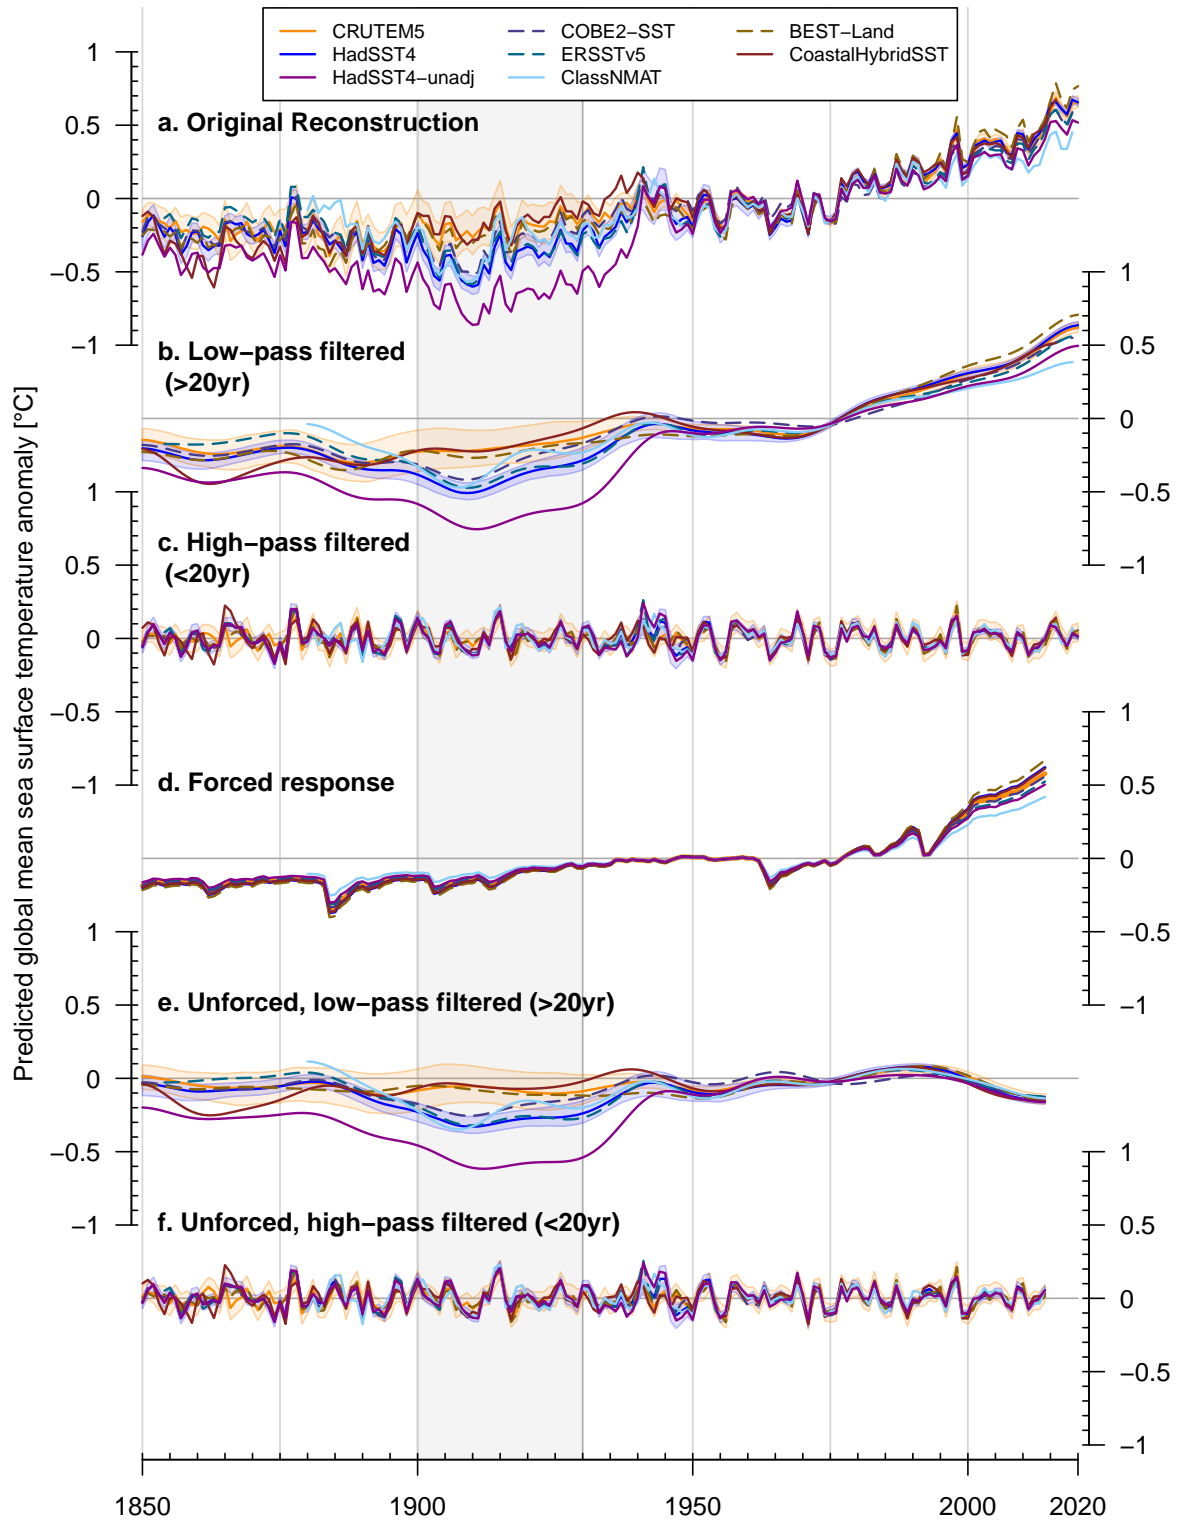

Supplementary Figure 3: **Global mean sea surface temperature (GMSST) reconstruction from the land and ocean record.** GMSST reconstructions from the SST record (HadSST4) and the land air temperature record (CRUTEM5). GMSST reconstructions from HadSST4-unadj, ClassNMAT, CoastalHybridSST, BEST-Land, COBE-SST2 and ERSSTv5 are similarly derived and shown for comparison. **a.** Original GMSST reconstructions, **b.** low-pass filtered reconstructions ( $> 20$ -year time scale), **c.** high-pass filtered reconstructions ( $< 20$ -year time scale), **d.** forced GMSST response for each reconstruction, **e.** unforced, low-pass filtered reconstruction, **f.** unforced, high-pass filtered reconstruction. Shading represents the 95th percentile uncertainty ranges of the  $\hat{T}_{HadSST4}^{GMSST}$  and  $\hat{T}_{CRUTEM5}^{GMSST}$  reconstructions, obtained by propagating the HadSST4 and CRUTEM5 ensemble of uncertainty realizations; bold lines show the median across the ensemble.



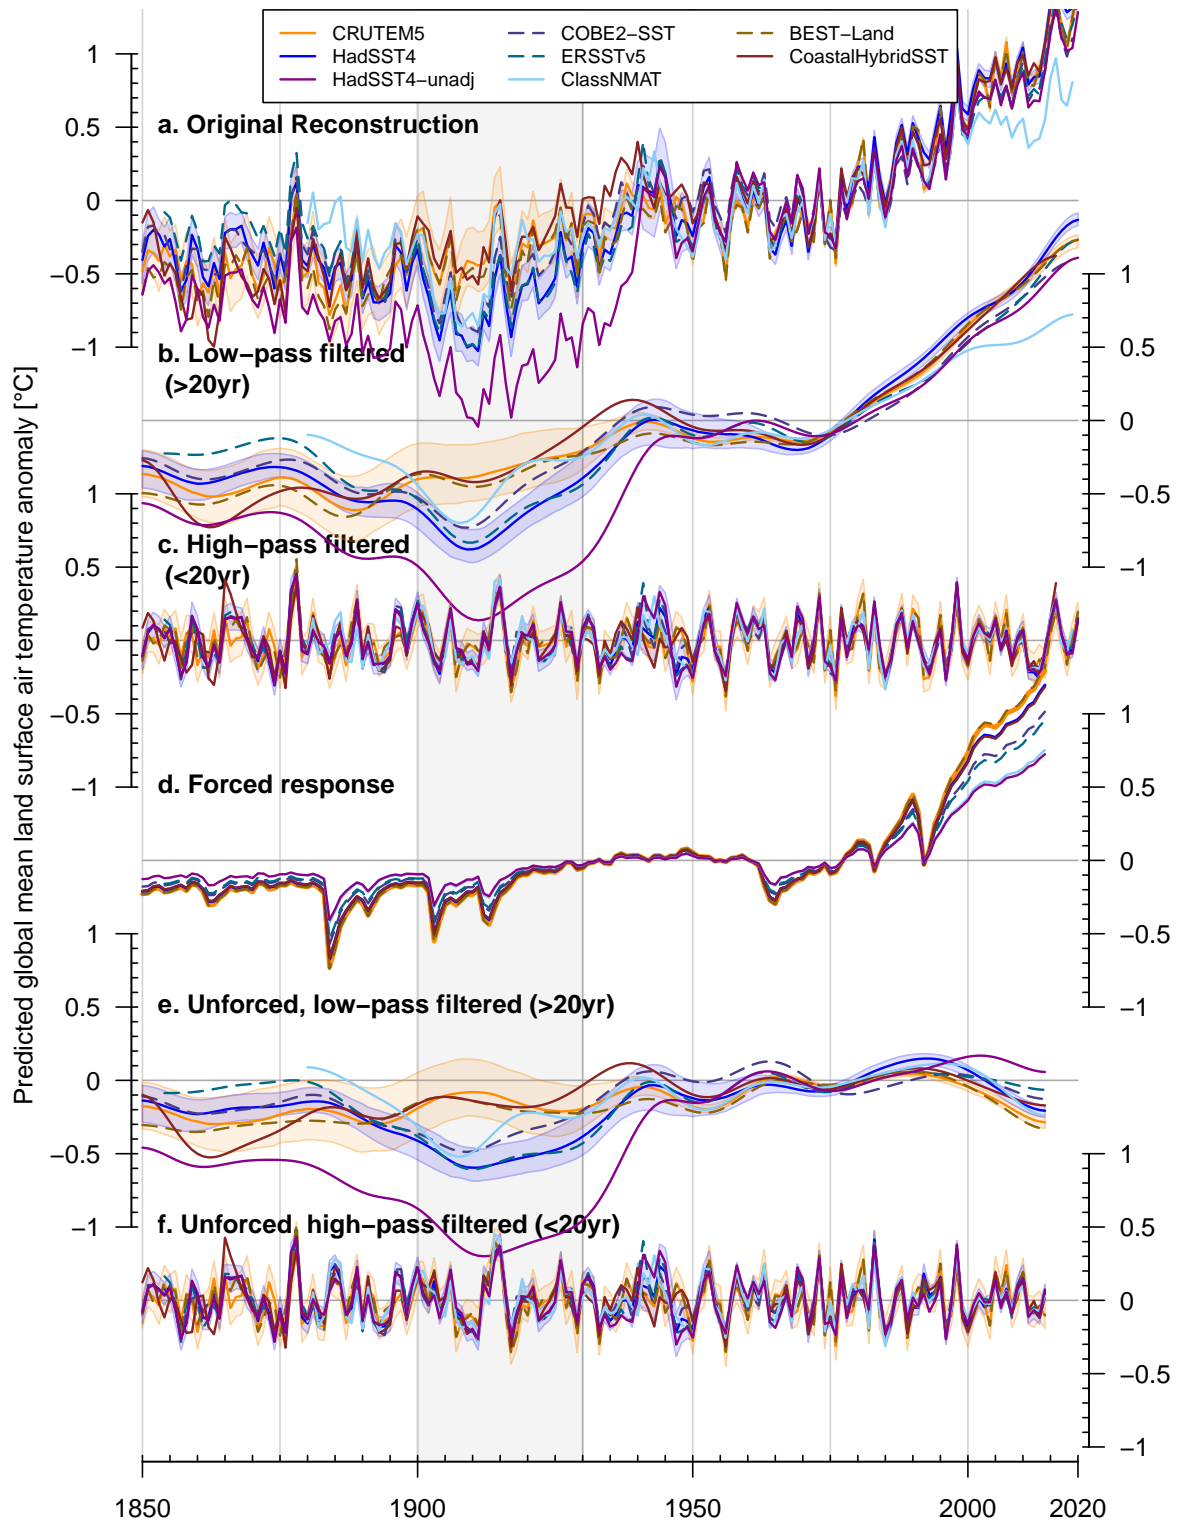

Supplementary Figure 4: **Global mean land surface air temperature (GMLSAT) reconstruction from the land and ocean record.** GMLSAT reconstructions from the SST record (HadSST4) and the land air temperature record (CRUTEM5). GMLSAT reconstructions from HadSST4-unadj, ClassNMAT, CoastalHybridSST, BEST-Land, COBE-SST2 and ERSSTv5 are similarly derived and shown for comparison. **a.** Original GMLSAT reconstructions, **b.** low-pass filtered reconstructions ( $> 20$ -year time scale), **c.** high-pass filtered reconstructions ( $< 20$ -year time scale), **d.** forced GMLSAT response for each reconstruction, **e.** unforced, low-pass filtered reconstruction, **f.** unforced, high-pass filtered reconstruction. Shading represents the 95th percentile uncertainty ranges of the  $\hat{T}_{HadSST4}^{GMLSAT}$  and  $\hat{T}_{CRUTEM5}^{GMLSAT}$  reconstructions, obtained by propagating the HadSST4 and CRUTEM5 ensemble of uncertainty realizations; bold lines show the median across the ensemble.

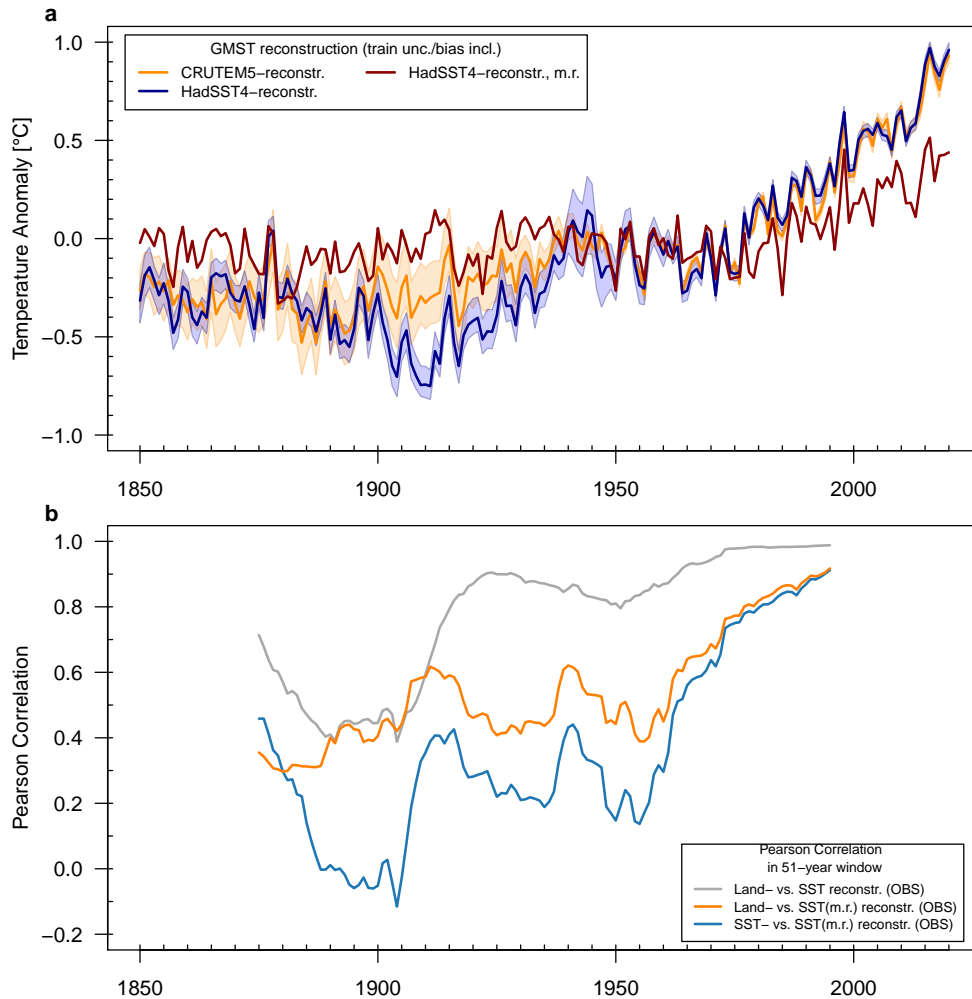

Supplementary Figure 5: **GMST reconstruction from SSTs with global mean removed.** **a.** this paper’s land- and ocean-based GMST reconstructions along with an experimental reconstruction where the global mean is removed from the SST pattern at each time step. This way, only relative anomalies in the pattern but not the global mean is retained in the analysis. **b** shows the Pearson correlation in 51-year windows between the land- and ocean-based reconstructions, and each reconstruction with the mean-removed SST reconstruction. The mean-removed SST reconstruction shows a higher agreement with the land reconstruction (orange line) than with the original SST reconstruction (blue line).

### 127 **3 Analysis of individual paleoclimate proxies from terrestrial and marine sources**

128 In addition to the analysis of the PAGES2k and Ocean2k paleoclimate reconstructions in the main  
129 text (Tierney et al. 2015; Neukom et al. 2019), we analyse individual uncalibrated paleoclimate  
130 proxy records for their multidecadal changes between 1901-20 vs. 1871-90 (similar to the main  
131 text).

132 We analyzed which proxies show a positive or negative anomaly from 1901-20 compared to  
133 1871-90. All proxy records are uncalibrated, and are shown as standardized z-scores relative to the  
134 1871-90 reference period. The analysis reveals a mixed pattern of cooling and warming between  
135 the two periods for both land and ocean proxies (Extended Data Fig. 6; the darker the color, the  
136 greater the cooling/warming; left panels show terrestrial proxies, right panels show marine prox-  
137 ies). A globally coherent cooling signal, as indicated by SST datasets does not emerge in marine or  
138 terrestrial proxies. The Western Atlantic appears to be the only region where marine proxy records  
139 show predominant cooling, which is consistent with our land-based reconstruction (see Main Text).  
140 Overall, the additional analysis of individual paleoclimate proxy records supports the hypothesis  
141 that the multi-decadal discrepancy between land and ocean temperature observations in the early  
142 twentieth century may be an artefact rather than a true climatic phenomenon.

#### 143 **4 Supplementary analysis of ICOADS contributing sources**

144 **Relative offsets between data sources in ICOADS in the period 1870-1935** The International  
145 Comprehensive Ocean-Atmosphere Data Set Release 3 (ICOADS) (Freeman et al. 2017) is the  
146 largest archive of surface marine data spanning more than two centuries. It is the main marine data  
147 source used to generate many of the data products used in climate science, including global surface  
148 temperature (Gulev et al. 2021). To enable a comparison of different data sources, anomalies have  
149 been calculated from the SST reports in ICOADS relative to a climatology for the period 1991-  
150 2020 averaged to a 1° latitude/longitude grid (Embury et al. 2024).

151 Extended Data Fig. 8 shows boxplots of global annual mean anomalies for five ICOADS  
152 subsets, for the HSSTD subset and for reports originating from Germany, the Netherlands, the  
153 UK and Japan. The HSSTD subset is substantially colder than any other data source from the  
154 1880s through to the 1910s and is the largest data source in the 1900s. The HSSTD subset is  
155 from the World Meteorological Organisation (WMO) Historical Sea Surface Temperature Data  
156 project (HSSTD) (WMO 1985). The contribution of each data source varies substantially over  
157 time (Extended Data Fig. 7) and regionally (not shown).

158 "For more than one hundred years ships of the voluntary observing fleets and more re-  
159 cently ocean weather ships have observed and recorded meteorological data from the  
160 oceans of the world. The Historical Sea Surface Temperature Data (HSSTD) Project  
161 was setup originally to collect all available sea surface temperature records held by the

162 major maritime nations for the period 1860-1960. These data were to be published in  
163 summary form for selected representative areas complemented by summary data for  
164 air temperature, surface wind speed and direction [...]

165 Sea surface temperature measurements by bucket only were selected for the summaries  
166 [...] Although considerable effort was made to exclude non-bucket-sea surface tem-  
167 perature measurements from the basic data it cannot be assumed that all unwanted  
168 measurements have been eliminated.” (WMO 1985)

169

170 HSSTD reports should therefore be predominantly from buckets, as should most of the re-  
171 ports in this period (Kennedy et al. 2019). That the HSSTD anomalies are noticeably colder than  
172 the rest of ICOADS suggests either that there are enough unidentified reports from engine intakes  
173 in the other ICOADS data sources during this period to partly offset the expected cold bias from  
174 the bucket-derived reports (Kent and Kennedy 2021) or these data are from buckets that show a  
175 larger cold bias than other sources. After World War I the anomalies become progressively less  
176 cold.

177 In contrast unadjusted anomalies from German and UK data sources are warmer in each  
178 decade during the period 1800-1939. The anomalies from the different country subsets are most  
179 similar in the decade with the coldest observations, the 1910s. German, Netherlands and UK  
180 anomalies all decrease over the decades from the 1880s to the 1910s, suggesting that there are  
181 changes in bucket types or measurement protocols for each of these countries over this period

182 (Kent et al. 2017) with observation practices for each subset becoming more similar to those from  
183 HSSTD over this period, albeit at different rates. From the 1910s to the 1930s each subset becomes  
184 warmer with each successive decade, apart from the Japanese subset which is affected by data  
185 truncation during transfer to punch cards in the period 1930 to 1953 (Chan et al. 2019). This is  
186 consistent with either improved protocols for bucket measurements leading to smaller cold biases  
187 or to an increasing contribution of measurements from engine intakes, or most likely both.

188 **Investigation into the source of the HSSTD records in ICOADS** ICOADS has been constructed  
189 from a variety of different data sources using a procedure called "dupelim" ([https://icoads.](https://icoads.noaa.gov/Release_1/suppK.html)  
190 [noaa.gov/Release\\_1/suppK.html](https://icoads.noaa.gov/Release_1/suppK.html)) to identify duplicates (different versions of the same  
191 original observation) among those data sources. In earlier releases of ICOADS (prior to Re-  
192 lease 2.5) the discarded duplicates were excluded from the archive which means it is not pos-  
193 sible to compare different versions of the same record that have arrived in ICOADS through  
194 different routes. The ICOADS DCK indicator gives information on the source of reports. The  
195 term DCK originates from the decks of punch cards that were the sources of data used prior to  
196 when ICOADS (then COADS) was assembled. Differences can arise between records from dif-  
197 ferent sources for a variety of reasons: conversions from local standard time to UTC may have  
198 been performed differently; elements may be dropped, rounded or truncated due to restrictions  
199 in the formats used; codes and derived variables may be subject to different conversions; there  
200 may be systematic errors in coding or translations; or transcription problems affecting individ-  
201 ual reports. This means that the comparisons between sources to identify possible duplicates  
202 is not an exact process and needs to employ tolerances. Whilst we have basic information on

203 the matches that were made and the characteristics of the data (for the 1800s here: [https://icoads.noaa.gov/e-doc/other/dupelim\\_sum\\_1800s](https://icoads.noaa.gov/e-doc/other/dupelim_sum_1800s) and for 1900 to 1945 here:  
204 [https://icoads.noaa.gov/e-doc/other/dupelim\\_sum\\_1900s](https://icoads.noaa.gov/e-doc/other/dupelim_sum_1900s)) it is not possible  
205 to make more detailed comparisons using this information.  
206

207 Supplementary Figure 6 shows the output of the dupelim summary for the period 1800 to  
208 1899 visualised as a chord diagram for data sources identified by their "DCK" indicator (Smith  
209 et al. 2022) or for the HSSTD grouping. Each chord is coloured according to the source selected  
210 for each pair, the colours around the edge represent the different sources. In the 1800s most of  
211 the data from HSST (red sector) get replaced with data from ICOADS DCKs 192, 193, 194 and  
212 201 (data from the German, Netherlands and UK archives (see key and (Smith et al. 2022))). The  
213 right hand panel shows the same information but with the log of the contributions to emphasise  
214 the smaller contributions. Figure 7 presents the same information for the period 1900 to 1945,  
215 with DCK contributing to fewer than 200k pairs combined as "other". For this period more of the  
216 HSST data is retained. As this information on DCK matches is extracted from summaries provided  
217 by ICOADS it is not possible to examine breakdowns of this information for different periods or  
218 regions.

219 The characteristics of HSSTD are different from the other main sources in ICOADS. Because  
220 HSSTD were selected to be from buckets only, observations from ICOADS that were paired with  
221 HSSTD are assigned the measurement method "implied bucket". Stratifying the data for Germany,  
222 the Netherlands and the UK according to whether a match with HSSTD had been identified showed



223 little difference between the reports for each country depending on this assignment. This suggests  
224 that the reason for the relatively cold anomalies in HSSTD is not due to unidentified engine intake  
225 observations, and that the remaining HSSTD reports in ICOADS are a distinct data source using  
226 bucket types and measurement protocols that gave a larger than typical heat loss. US observation  
227 sources are largely absent in this period, so it can be hypothesized that the HSSTD are from the  
228 missing US national archive. The observing instructions for the US published in 1906 (and also in  
229 1910), describes a sampling protocol likely to lead to relative large cold biases in the observations:

230        "The water whose temperature is taken should be drawn from a depth of 3 feet below  
231        the surface, the bucket in which it is drawn being weighted in order to sink it. The bulb  
232        of the thermometer should remain immersed in the water at least three minutes before  
233        reading, and the reading should be made with the bulb immersed." (Page 1906)

234

235        In 1925 the US instructions (*Instructions to Marine Meteorological Observers 1925*) remain  
236        the same, but also notes the desirability for a shorter gap of about 1 minute between sampling  
237        and measurement and recommended active stirring. A special brass sampling container is pictured  
238        but also suggests vertical stiffening for the ordinary canvas bucket. By 1929 (*Instructions to Ma-*  
239        *rine Meteorological Observers 1929*) the instructions are similar but with further encouragement  
240        toward shorter measurement periods especially when the wet bulb depression is large and that  
241        measurement should be made out of both the wind and the sun.

242 By 1938 the US instructions provide seven steps for making accurate SST measurements  
 243 using buckets, emphasizing the need to make the measurement as quickly as it is safe to do (*In-*  
 244 *structions to Marine Meteorological Observers* 1938). The benefits of stiffening of canvas buckets  
 245 is mentioned and the picture of the brass sampler is not included. The instructions describe the  
 246 engine intake method as simpler, and stresses that the method used should be chosen to be that ex-  
 247 pected to be more accurate and that the method used should be recorded. This is again consistent  
 248 with a reducing cold anomaly for the HSSTD over the period 1920 onwards (Extended Data Fig.  
 249 8).

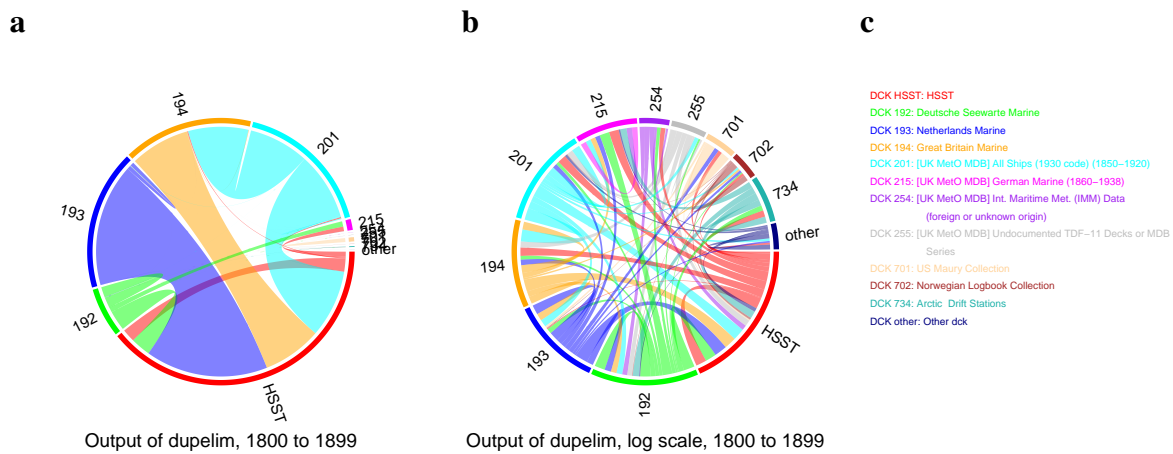

Supplementary Figure 6: **Dupelim output information from ICOADS Release 1, 1800-1899.**

Segments of the circle are coloured by data source (ICOADS DCK or HSST) and the connecting chord is colored by the retained source. Data sources contributing to fewer than 1000 matches have been combined into a single category (other). **a** Visualisation of number of pairs; **b** log of number of pairs; **c** key to data sources.

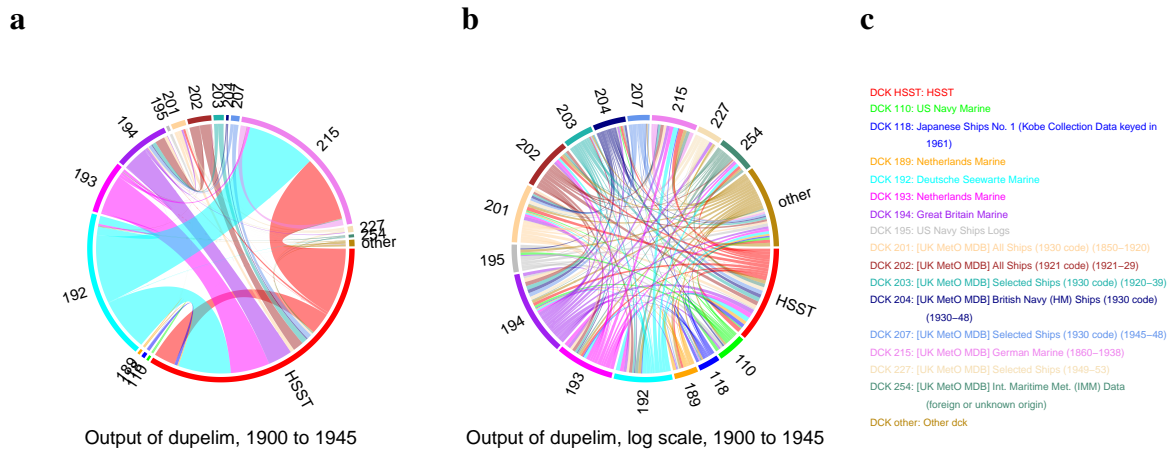

Supplementary Figure 7: **Dupelim output information from ICOADS Release 1, for 1900-1945.**

Data sources contributing to fewer than 200k matches have been combined into a single category (other). **a** Visualisation of number of pairs; **b** log of number of pairs; **c** key to data sources.

250 **5 Ocean warming constrained by land warming and paleoclimate reconstructions using**  
 251 **50-year trends**

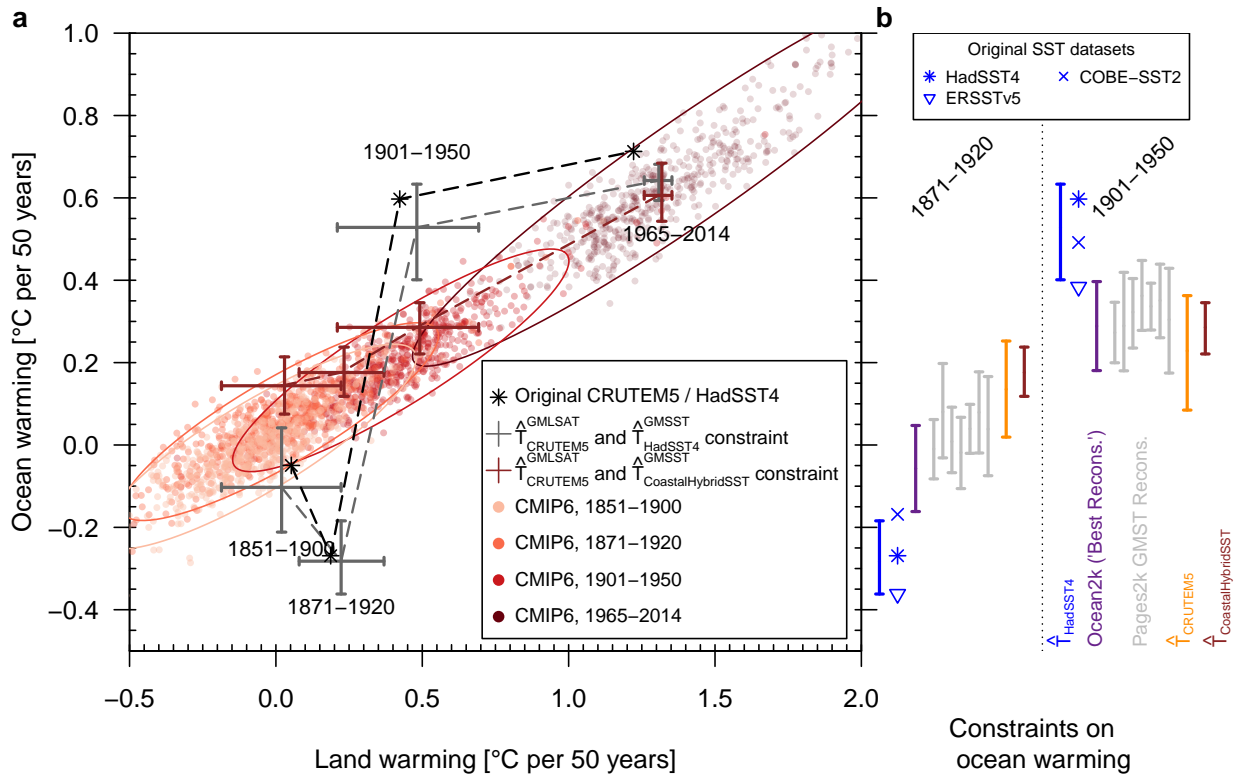

Supplementary Figure 8: **Ocean warming constrained by land warming and paleoclimate reconstructions, shown for 50-year trends.** **a.** Land and ocean warming on multi-decadal time scales is closely linked across CMIP6 models (trends over 50 years for different historical periods). **b.** Constraints from land air temperature (CRUTEM5 and Coastal Hybrid SST) and paleoclimate reconstructions (PAGES 2k and Ocean 2k) show reduced ocean cooling in the 1871-1920 period due to a less pronounced early twentieth century cold anomaly. This period is followed by more moderate 1901-1950 warming compared to HadSST4 data.

Supplementary Table 1: Overview of global mean temperature reconstructions by source and training dataset.

253

| Target metrics                  | Source dataset             | Training dataset + mask     | Training un-certainties | Further notes                                              |
|---------------------------------|----------------------------|-----------------------------|-------------------------|------------------------------------------------------------|
| GMST, GMSST, GMLSAT, IO, WP, WA | CRUTEM5 (LSAT)             | CMIP6 LSAT & CRUTEM5 mask   | CRUTEM5                 | Standard land-based reconstruction                         |
| GMST, GMSST, GMLSAT             | Berkeley Earth Land (LSAT) | CMIP6 LSAT & CRUTEM5 mask   | CRUTEM5                 | -                                                          |
| GMST, GMSST, GMLSAT, TMSST      | HadSST4 (SST)              | CMIP6 SST & HadSST4 mask    | HadSST4                 | Standard ocean-based reconstruction                        |
| GMST, GMSST, GMLSAT             | COBE-SST2 (SST)            | CMIP6 SST & HadSST4 mask    | HadSST4                 | -                                                          |
| GMST, GMSST, GMLSAT             | ERSST5 (SST)               | CMIP6 SST & HadSST4 mask    | HadSST4                 | -                                                          |
| GMST, GMSST, GMLSAT             | HadSST4-unadj              | CMIP6 SST & HadSST4 mask    | HadSST4                 | Unadjusted HadSST4 dataset                                 |
| GMST, GMSST, GMLSAT             | HadSST4-MR (SST)           | CMIP6-MR SST & HadSST4 mask | HadSST4                 | global mean removed from each grid cell for each time step |
| GMST, GMSST, GMLSAT             | Cowtan-Hybrid36 (SST)      | CMIP6 SST & HadSST3 mask    | HadSST3                 | SST dataset with coastal corrections to match LSATs        |
| GMST, GMSST, GMLSAT             | ClassNMAT (NMAT)           | CMIP6 MAT & ClassNMAT mask  | ClassNMAT               | Reconstruction based on night-time marine air temperatures |

254

Supplementary Table 2: Overview of gridded observational datasets used for reconstructions

| Dataset short name | Long name                                                                                                           | Variable | Reference                            | URL                                                                                                                                                                       | Notes                                                                     |
|--------------------|---------------------------------------------------------------------------------------------------------------------|----------|--------------------------------------|---------------------------------------------------------------------------------------------------------------------------------------------------------------------------|---------------------------------------------------------------------------|
| CRUTEM 5.0.1.0     | Climatic Research Unit temperature version 5                                                                        | LSAT     | Osborn et al. (2021)                 | <a href="https://www.metoffice.gov.uk/hadobs/crutem5/data/CRUTEM.5.0.1.0/download.html">https://www.metoffice.gov.uk/hadobs/crutem5/data/CRUTEM.5.0.1.0/download.html</a> | incl. error estimates (CRUTEM5) and bias ensemble extracted from HadCRUT5 |
| HadSST 4.0.1.0     | Met Office Hadley Centre SST data set version 4                                                                     | SST      | Kennedy et al. (2019)                | <a href="https://www.metoffice.gov.uk/hadobs/hadsst4/data/download.html">https://www.metoffice.gov.uk/hadobs/hadsst4/data/download.html</a>                               | incl. error estimates and bias ensemble from HadSST4                      |
| ClassNMAT 1.0.0.0  | Climate Linked Atlantic Sector Science (CLASS) night-time marine air temperature                                    | NMAT     | Cornes et al. (2020)                 | <a href="https://catalogue.ceda.ac.uk/uuid/5bbf48b128bd488dbb10a56111feb36a">https://catalogue.ceda.ac.uk/uuid/5bbf48b128bd488dbb10a56111feb36a</a>                       | incl. ClassNMAT error estimates                                           |
| BEST-Land          | Berkeley Earth Land                                                                                                 | LSAT     | Rohde and Hausfather (2020)          | <a href="https://berkeleyearth.org/data/">https://berkeleyearth.org/data/</a>                                                                                             | -                                                                         |
| ERSSTv5            | Extended Reconstructed Sea Surface Temperature, Version 5                                                           | SST      | Huang et al. (2017)                  | <a href="https://psl.noaa.gov/data/gridded/data.noaa.ersst.v5.html">https://psl.noaa.gov/data/gridded/data.noaa.ersst.v5.html</a>                                         | -                                                                         |
| COBE-SST2          | Centennial In Situ Observation Based Estimates of the Variability of SST and Marine Meteorological Variables (COBE) | SST      | Hirahara, Ishii, and Fukuda (2014)   | <a href="https://psl.noaa.gov/data/gridded/data.cobe2.html">https://psl.noaa.gov/data/gridded/data.cobe2.html</a>                                                         | -                                                                         |
| Coastal-HybridSST  | Coastal SST corrected dataset                                                                                       | SST      | Cowtan, Rohde, and Hausfather (2018) | <a href="https://www-users.york.ac.uk/~kdc3/papers/evaluating2017/">https://www-users.york.ac.uk/~kdc3/papers/evaluating2017/</a>                                         | -                                                                         |

Supplementary Table 3: Overview of GMST datasets and paleoclimate reconstructions

| Dataset short name | Long name                                                                   | Variable            | Reference                                         | URL                                                                                                                                                                       | Notes |
|--------------------|-----------------------------------------------------------------------------|---------------------|---------------------------------------------------|---------------------------------------------------------------------------------------------------------------------------------------------------------------------------|-------|
| HadCRUT5           | Hadley Centre/Climatic Research Unit global surface temperature dataset     | GMST                | Morice et al. (2021)                              | <a href="https://www.metoffice.gov.uk/hadobs/crutem5/data/CRUTEM.5.0.1.0/download.html">https://www.metoffice.gov.uk/hadobs/crutem5/data/CRUTEM.5.0.1.0/download.html</a> | -     |
| BEST               | Berkeley Earth Global Monthly Land + Ocean                                  | GMST                | Rohde and Hausfather (2020)                       | <a href="https://berkeleyearth.org/data/">https://berkeleyearth.org/data/</a>                                                                                             | -     |
| CW2014             | Cowan and Way kriging-interpolated Had-CRUT4                                | GMST                | Cowan and Way (2014)                              | <a href="https://www-users.york.ac.uk/~kdc3/papers/coverage2013/">https://www-users.york.ac.uk/~kdc3/papers/coverage2013/</a>                                             | -     |
| CW2014-COBE2       | Cowan and Way kriging-interpolated COBE2                                    | GMST                | Cowan and Way (2014)                              | <a href="https://www-users.york.ac.uk/~kdc3/papers/coverage2013/">https://www-users.york.ac.uk/~kdc3/papers/coverage2013/</a>                                             | -     |
| JMA-GMST           | Japanese Meteorological Agency Global Average Surface Temperature Anomalies | GMST                | Hirahara, Ishii, and Fukuda (2014)                | <a href="https://ds.data.jma.go.jp/tcc/tcc/products/gwp/temp/ann_wld.html">https://ds.data.jma.go.jp/tcc/tcc/products/gwp/temp/ann_wld.html</a>                           | -     |
| NOAA GlobTemp 5.1  | NOAA Merged Land Ocean Global Surface Temperature Analysis                  | GMST                | Vose et al. (2021)                                | <a href="https://www.ncei.noaa.gov/products/land-based-station/noaa-global-temp">https://www.ncei.noaa.gov/products/land-based-station/noaa-global-temp</a>               | -     |
| NASA-GISTEMP       | GISS Surface Temperature Analysis 4                                         | GMST                | Lenssen et al. (2019)                             | <a href="https://data.giss.nasa.gov/gistemp/">https://data.giss.nasa.gov/gistemp/</a>                                                                                     | -     |
| Pages 2k GMST      | PAGES 2k multi-proxy GMST reconstructions                                   | GMST (from proxies) | Emile-Geay et al. (2017) and Neukom et al. (2019) | <a href="https://www.ncei.noaa.gov/access/paleo-search/study/26872">https://www.ncei.noaa.gov/access/paleo-search/study/26872</a>                                         | -     |
| Ocean 2k           | Ocean 2k Tropical sea surface temperature reconstructions                   | GMST                | Tierney et al. (2015)                             | <a href="https://www.ncei.noaa.gov/access/paleo-search/study/17955">https://www.ncei.noaa.gov/access/paleo-search/study/17955</a>                                         | -     |

Supplementary Table 4: Overview of CMIP6 models used in the analysis.

| Model name        | Model abbrev. <sup>a</sup> | # Ens. Members in Training | # Ens. Members in Analysis |
|-------------------|----------------------------|----------------------------|----------------------------|
| ACCESS-CM2        | ACC                        | 3                          | 5                          |
| ACCESS-ESM1-5     | ACC                        | 3                          | 40                         |
| AWI-CM-1-1-MR     | AWI                        | 0                          | 5                          |
| AWI-ESM-1-1-LR    | AWI                        | 0                          | 1                          |
| BCC-CSM2-MR       | BCC                        | 0                          | 3                          |
| BCC-ESM1          | BCC                        | 3                          | 3                          |
| CAMS-CSM1-0       | CAM                        | 3                          | 3                          |
| CESM2-FV2         | CES                        | 2                          | 3                          |
| CESM2-WACCM-FV2   | CES                        | 2                          | 3                          |
| CESM2-WACCM       | CES                        | 2                          | 3                          |
| CESM2             | CES                        | 2                          | 11                         |
| CIesm             | CIE                        | 0                          | 3                          |
| CMCC-CM2-HR4      | CMC                        | 0                          | 1                          |
| CMCC-CM2-SR5      | CMC                        | 3                          | 11                         |
| CMCC-ESM2         | CMC                        | 0                          | 1                          |
| CNRM-CM6-1-HR     | CNR                        | 0                          | 1                          |
| CNRM-CM6-1        | CNR                        | 3                          | 30                         |
| CNRM-ESM2-1       | CNR                        | 3                          | 11                         |
| CanESM5-CanOE     | Can                        | 3                          | 3                          |
| CanESM5           | Can                        | 3                          | 65                         |
| E3SM-1-0          | E3S                        | 3                          | 4                          |
| E3SM-1-1-ECA      | E3S                        | 0                          | 1                          |
| E3SM-1-1          | E3S                        | 0                          | 1                          |
| EC-Earth3-AerChem | EC-                        | 0                          | 1                          |
| EC-Earth3-Veg-LR  | EC-                        | 2                          | 3                          |
| EC-Earth3-Veg     | EC-                        | 2                          | 8                          |
| EC-Earth3         | EC-                        | 2                          | 23                         |
| FGOALS-f3-L       | FGO                        | 3                          | 3                          |
| FGOALS-g3         | FGO                        | 3                          | 6                          |
| FIO-ESM-2-0       | FIO                        | 0                          | 3                          |
| GFDL-ESM4         | GFD                        | 3                          | 3                          |
| GISS-E2-1-G-CC    | GIS                        | 0                          | 1                          |
| GISS-E2-1-G       | GIS                        | 3                          | 40                         |
| GISS-E2-1-H       | GIS                        | 3                          | 25                         |
| GISS-E2-2-G       | GIS                        | 0                          | 11                         |
| GISS-E2-2-H       | GIS                        | 0                          | 5                          |
| HadGEM3-GC31-LL   | Had                        | 2                          | 5                          |
| HadGEM3-GC31-MM   | Had                        | 2                          | 4                          |
| INM-CM4-8         | INM                        | 0                          | 1                          |
| INM-CM5-0         | INM                        | 3                          | 10                         |
| IPSL-CM6A-LR-INCA | IPS                        | 0                          | 1                          |
| IPSL-CM6A-LR      | IPS                        | 3                          | 33                         |
| KACE-1-0-G        | KAC                        | 0                          | 3                          |
| MIROC-ES2H        | MIR                        | 2                          | 3                          |
| MIROC-ES2L        | MIR                        | 2                          | 31                         |
| MIROC6            | MIR                        | 2                          | 50                         |
| MPI-ESM-1-2-HAM   | MPI                        | 2                          | 3                          |
| MPI-ESM1-2-HR     | MPI                        | 2                          | 10                         |
| MPI-ESM1-2-LR     | MPI                        | 2                          | 31                         |
| MRI-ESM2-0        | MRI                        | 3                          | 12                         |
| NESM3             | NES                        | 0                          | 5                          |
| NorCPM1           | Nor                        | 2                          | 30                         |
| NorESM2-LM        | Nor                        | 2                          | 3                          |
| NorESM2-MM        | Nor                        | 2                          | 3                          |
| SAM0-UNICON       | SAM                        | 0                          | 1                          |
| TaiESM1           | Tai                        | 0                          | 1                          |
| UKESM1-0-LL       | UKE                        | 3                          | 17                         |
| UKESM1-1-LL       | UKE                        | 0                          | 1                          |
| Total             |                            | 93                         | 602                        |

<sup>a</sup> Model abbreviation indicates the models that stem from the same model variant and are used in the training step.



255 **References**

- 256 Chan, D. et al. (2019). “Correcting datasets leads to more homogeneous early-twentieth-century  
257 sea surface warming”. In: *Nature* 571.7765, pp. 393–397.
- 258 Cornes, R. C. et al. (2020). “CLASSnmat: A global night marine air temperature data set, 1880–2019”.  
259 In: *Geoscience Data Journal* 7.2, pp. 170–184.
- 260 Cowtan, K., R. Rohde, and Z. Hausfather (2018). “Evaluating biases in sea surface temperature  
261 records using coastal weather stations”. In: *Quarterly Journal of the Royal Meteorological*  
262 *Society* 144.712, pp. 670–681.
- 263 Cowtan, K. and R. G. Way (2014). “Coverage bias in the HadCRUT4 temperature series and its  
264 impact on recent temperature trends”. In: *Quarterly Journal of the Royal Meteorological*  
265 *Society* 140.683, pp. 1935–1944.
- 266 Cowtan, K. et al. (2018). “Statistical analysis of coverage error in simple global temperature esti-  
267 mators”. In: *Dynamics and Statistics of the Climate System* 3.1, dzy003.
- 268 Embury, O. et al. (2024). “Satellite-based time-series of sea-surface temperature since 1980 for  
269 climate applications”. In: *Scientific Data* 11.1.
- 270 Emile-Geay, J. et al. (2017). “A global multiproxy database for temperature reconstructions of the  
271 Common Era”. In: *Scientific Data* 4.1, p. 170088.
- 272 Freeman, E. et al. (2017). “ICOADS Release 3.0: a major update to the historical marine climate  
273 record”. In: *International Journal of Climatology* 37.5, pp. 2211–2232.

274 Gulev, S. K. et al. (2021). *Changing state of the climate system. In Climate Change 2021: The*  
275 *Physical Science Basis. Contribution of Working Group I to the Sixth Assessment Report of*  
276 *the Intergovernmental Panel on Climate Change. IPCC Sixth Assessment Report.*

277 Hirahara, S., M. Ishii, and Y. Fukuda (2014). “Centennial-Scale Sea Surface Temperature Analysis  
278 and Its Uncertainty”. In: *Journal of Climate* 27.1, pp. 57–75.

279 Huang, B. et al. (2017). “Extended Reconstructed Sea Surface Temperature, Version 5 (ERSSTv5):  
280 Upgrades, Validations, and Intercomparisons”. In: *Journal of Climate* 30.20, pp. 8179–8205.

281 *Instructions to Marine Meteorological Observers* (1925). Tech. rep. Circular M, Fourth Edition.  
282 Washington, US: US Weather Bureau.

283 *Instructions to Marine Meteorological Observers* (1929). Tech. rep. Circular M, Fifth Edition.  
284 Washington, US: US Weather Bureau.

285 *Instructions to Marine Meteorological Observers* (1938). Tech. rep. Circular M, Sixth Edition.  
286 Washington, US: US Weather Bureau.

287 Kennedy, J. J. et al. (2019). “An Ensemble Data Set of Sea Surface Temperature Change From  
288 1850: The Met Office Hadley Centre HadSST.4.0.0.0 Data Set”. In: *Journal of Geophysical*  
289 *Research: Atmospheres* 124.14, pp. 7719–7763.

290 Kent, E. C. and J. J. Kennedy (2021). “Historical Estimates of Surface Marine Temperatures”. In:  
291 *Annual Review of Marine Science* 13.1, pp. 283–311.

292 Kent, E. C. et al. (2017). “A Call for New Approaches to Quantifying Biases in Observations of Sea  
293 Surface Temperature”. In: *Bulletin of the American Meteorological Society* 98.8, pp. 1601–  
294 1616.

- 295 Lenssen, N. J. L. et al. (2019). “Improvements in the GISTEMP Uncertainty Model”. In: *Journal*  
296 *of Geophysical Research: Atmospheres* 124.12, pp. 6307–6326.
- 297 Morice, C. P. et al. (2021). “An Updated Assessment of Near-Surface Temperature Change From  
298 1850: The HadCRUT5 Data Set”. In: *Journal of Geophysical Research: Atmospheres* 126.3,  
299 e2019JD032361.
- 300 Neukom, R. et al. (2019). “Consistent multidecadal variability in global temperature reconstruc-  
301 tions and simulations over the Common Era”. In: *Nature Geoscience* 12.8, pp. 643–649.
- 302 Osborn, T. J. et al. (2021). “Land Surface Air Temperature Variations Across the Globe Updated to  
303 2019: The CRUTEM5 Data Set”. In: *Journal of Geophysical Research: Atmospheres* 126.2,  
304 e2019JD032352.
- 305 Page, J. (1906). *Instructions to the Marine Meteorological Observers of the U. S. Weather Bureau*.  
306 Tech. rep. Washington, US: US Weather Bureau.
- 307 Rohde, R. A. and Z. Hausfather (2020). “The Berkeley Earth Land/Ocean Temperature Record”.  
308 In: *Earth System Science Data* 12.4, pp. 3469–3479.
- 309 Sippel, S. et al. (2020). “Climate change now detectable from any single day of weather at global  
310 scale”. In: *Nature Climate Change* 10.1, pp. 35–41.
- 311 Smith, S. R. et al. (2022). *The International Maritime Meteorological Archive (IMMA) Format*.  
312 Tech. rep. ICOADS.
- 313 Tierney, J. E. et al. (2015). “Tropical sea surface temperatures for the past four centuries recon-  
314 structed from coral archives”. In: *Paleoceanography* 30.3, pp. 226–252.

315 Vose, R. S. et al. (2021). “Implementing Full Spatial Coverage in NOAA’s Global Temperature  
316 Analysis”. In: *Geophysical Research Letters* 48.4, e2020GL090873.

317 WMO (1985). *Users’s Guide to the Data and Summaries of the Historical Sea Surface Temperature*  
318 *Data Project*. Tech. rep. WMO/TD-No. 36. Geneva, Switzerland: Secretariat of the World  
319 Meteorological Organization.
